# Supplementary material for: The detection of trans gene fragments of hEPO in gene doping model mice by Taqman qPCR assay
Source: PeerJ journal article supplement (doi:10.7717/peerj.8595), 2020-02-25

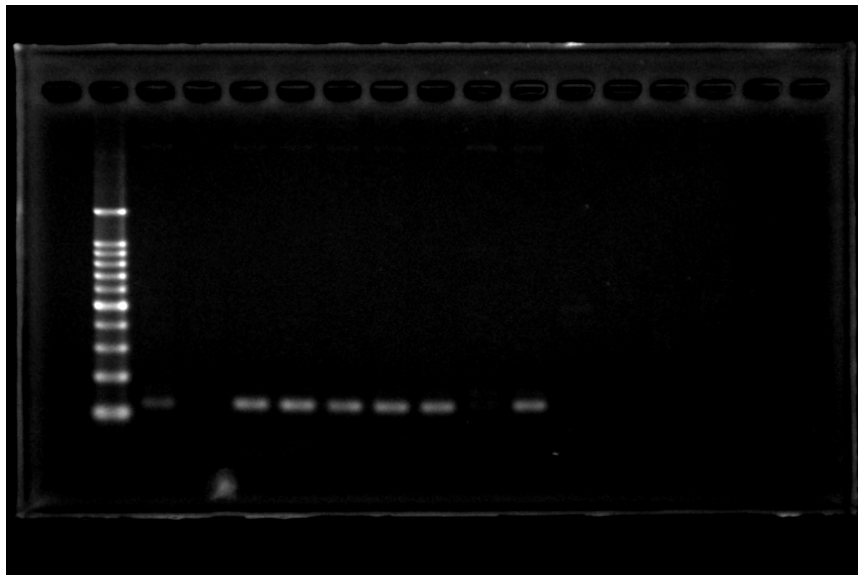

Supplement: 20190624_Epogenedoping_Taqman_Blood&human_2_invert.pdf [file 20190624_Epogenedoping_Taqman_Blood%26human_2_invert.pdf]
