# Supplementary material for: The detection of trans gene fragments of hEPO in gene doping model mice by Taqman qPCR assay
Source: PeerJ. 2020 Feb 25;8:e8595. doi: 10.7717/peerj.8595 (PMC7047860; doi:10.7717/peerj.8595)
Supplement: Supplemental Information 2 [file peerj-08-8595-s002.xlsx]

## Sheet: Taqman Blood
1h						2h						3h						6h						12h						24h						48h
	IV		Ave	Number of Copy			IV		Ave	Number of Copy			IV		Ave	Number of Copy			IV		Ave	Number of Copy			IV		Ave	Number of Copy			IV		Ave	Number of Copy			IV		Ave	Number of Copy
No.1	980.284	938.13	959.207	14747.6		No.1	245.996	243.847	244.922	3765.62		No.1	210.492	198.29	204.391	3142.46		No.1	569.191	579.898	574.544	8833.49		No.1	47.1878	47.7842	47.486	730.086		No.1	0.604321	0.677335	0.640828	9.85258		No.1
No.2	486.296	500.278	493.287	7584.18		No.2	97.5055	113.532	105.519	1622.33		No.2	542.7	523.244	532.972	8194.32		No.2	175.309	188.575	181.942	2797.32		No.2	37.7175	34.4857	36.1016	555.053		No.2	1.21512	0.889049	1.05208	16.1756		No.2
No.3	14724.6	14090.1	14407.4	221510		No.3	4201.46	4178.47	4189.97	64419.8		No.3	1338.45	1969.21	1653.83	25427.3		No.3	393.233	361.68	377.457	5803.31		No.3	21.7728	19.6253	20.6991	318.243		No.3	1.45117	1.47137	1.46127	22.4667		No.3	2.26866	1.72057	1.99461	30.6667
No.4	5682.97	5108.16	5395.57	82955.6		No.4	2231.81	2307.07	2269.44	34892.1		No.4						No.4						No.4						No.4						No.4
No.5	516.541	585.495	551.018	8471.77		No.5	27.2266	24.0164	25.6215	393.924		No.5	132.384	129.174	130.779	2010.69		No.5	11.1993	10.6033	10.9013	167.605		No.5	1.30236	1.8394	1.57088	24.1519		No.5						No.5
No.6	33204.2	31559.4	32381.8	497863		No.6	2102.47	1996.14	2049.3	31507.6		No.6	2700.27	3059.3	2879.78	44276		No.6	1240.93	1309.11	1275.02	19603.2		No.6	4390.75	4352.11	4371.43	67209.7		No.6	1.506	1.55658	1.53129	23.5433		No.6	1.38678	1.19676	1.29177	19.8607
No.7	248859	286630	267744	4.11651e+06		No.7	1942.08	1883.51	1912.8	29408.8		No.7	3048.5	3340.25	3194.38	49112.8		No.7	779.223	773.455	776.339	11936		No.7	45.372	43.5566	44.4643	683.629		No.7	1.27121	0.857294	1.06425			No.7	3.50865	4.32237	3.91551	60.2
No.8	3173.45	3405.83	3289.64	50577.5		No.8	2578.33	2524.05	2551.19	39223.9		No.8	1843.02	2063.31	1953.17	30029.5		No.8	85.7005	90.496	88.0983	1354.49		No.8	2.10875	1.79302	1.95089	29.9945		No.8						No.8	1.10947	0.952598	1.03103	15.8519
No.9	22888.1	21493.1	22190.6	341175		No.9	1656.63	1601.36	1629	25045.4		No.9	5821.44	6030.64	5926.04	91111.6		No.9	944.89	849.693	897.291	13795.7		No.9	72.4395	59.2988	65.8691	1012.72		No.9	2.77071	4.15884	3.46478	53.2702		No.9	6.82714	5.74032	6.28373	96.6109
No.10	138227	129518	133872	2.05826e+06	SE	No.10	3126.26	3250.41	3188.33	49019.9	SE	No.10	14977.5	14525.4	14751.5	226800	SE	No.10	1234.8	1259.86	1247.33	19177.5	SE	No.10	64.6919	61.2899	62.9909	968.471	SE	No.10	4.19845	3.59459	3.89652	59.9081	SE	No.10	1.52274	1.72488	1.62381	24.9657	SE
AV				739965	423342	AV				27929.9	6674.88	AV				53345	23608.6	AV				9274.28	2449.87	AV				7948.01	7408.69	AV				30.8694	8.42008	AV				41.3593	12.7849
	IM						IM						IM						IM						IM						IM						IM
No.1	5273.57	6092.35	5682.96	87374.2		No.1	1271.53	1480.66	1376.1	21157.2		No.1	1730.33	2024.18	1877.26	28862.4		No.1						No.1						No.1						No.1
No.2	804.184	806.909	805.547	12385.1		No.2	152.325	135.2	143.762	2210.31		No.2	942.715	1019.79	981.254	15086.6		No.2	84.7454	73.2911	79.0182	1214.89		No.2	1.49061	1.0021	1.24636	19.1625		No.2						No.2			#DIV/0!
No.3	7522.18	7837.88	7680.03	118079		No.3	965.208	873.249	919.229	14132.9		No.3	1047.23	1027.29	1037.26	15947.6		No.3	1617.17	1361.13	1489.15	22895.3		No.3	25.1578	23.6268	24.3923	375.026		No.3						No.3	0.975566		0.975566	14.9991
No.4	6524.83	8206.52	7365.67	113246		No.4	1671.05	1732.26	1701.66	26162.6		No.4	4534.62	4573.41	4554.02	70017		No.4	362.906	351.984	357.445	5495.63		No.4	20.6961	17.7547	19.2254	295.586		No.4			#DIV/0!			No.4	8.02493	11.8487	9.93681	152.776
No.5	3116.59	3482.1	3299.35	50726.7		No.5						No.5						No.5						No.5						No.5						No.5
No.6	2199.85	2693.14	2446.49	37614.3		No.6	1392.02	1335.3	1363.66	20966		No.6	6065.14	6740.27	6402.7	98440.1		No.6	890.116	908.24	899.178	13824.7		No.6	6.8735	6.47131	6.67241	102.587		No.6						No.6	1.24615	1.27254	1.25934	19.3621
No.7	4808.86	6361.63	5585.25	85871.9		No.7	369.757	376.008	372.882	5732.98		No.7	7082	6743.62	6912.81	106283		No.7	385.555	354.605	370.08	5689.9		No.7	26.6666	25.5193	26.093	401.173		No.7						No.7	2.14198	1.99131	2.06664	31.7742
No.8	7645.13	9498.33	8571.73	131788		No.8	5130.07	5260.51	5195.29	79876.5		No.8	1687.7	1666.37	1677.03	25784		No.8	238.139	243.523	240.831	3702.72		No.8	12.4652	13.0394	12.7523	196.063		No.8	0.316381	0.205345	0.260863	4.0107		No.8	1.57798	0.879725	1.22885	18.8933
No.9	6086.07	6066.19	6076.13	93419.1		No.9	1152.35	978.731	1065.54	16382.5		No.9	8746.37	9381.53	9063.95	139356		No.9	1960	1892.79	1926.4	29617.9		No.9	10.6406	11.7845	11.2125	172.39		No.9						No.9	2.88792	2.59902	2.74347	42.1803
No.10	7355.31	7322.73	7339.02	112836	SE	No.10	685.16	685.554	685.357	10537.2	SE	No.10	1443.55	2170.02	1806.79	27778.9	SE	No.10	2365.92	2157.63	2261.78	34774.4	SE	No.10	7.73199	7.45926	7.59562	116.781	SE	No.10	0.522041	0.386892	0.454467	6.98732	SE	No.10	3.17995	4.76913	3.97454	61.1077	SE
AV				84334	12302.6	AV				21906.5	7682.78	AV				58617.3	15427.5	AV				14651.9	4555.47	AV				209.846	48.0626	AV				5.49901	1.48831	AV				48.7276	18.3872
	IP						IP						IP						IP						IP						IP						IP
No.1	60.9298	83.3304	72.1301	1108.98		No.1	2.68747	15.2898	8.98864	138.198		No.1	4.69463	4.45893	4.57678	70.3669		No.1	9.81172	15.8298	12.8208	197.116		No.1						No.1						No.1	0.510051	0.988484	0.749268	11.5198
No.2	19.8821	16.9681	18.4251	283.281		No.2		2.50424	2.50424	38.5022		No.2	8.49934	9.05975	8.77955	134.984		No.2	6.37958	7.08505	6.73231	103.508		No.2	0.358209	0.345483	0.351846	5.40955		No.2	0.424185	0.341585	0.382885	5.88677		No.2
No.3	2242.53	2211.79	2227.16	34242		No.3	5.18844	4.95807	5.07325	78.0001		No.3	13.267	15.844	14.5555	223.788		No.3	6.63921	5.78475	6.21198	95.5078		No.3	251.226		251.226	3862.54		No.3						No.3	27.9915	29.1381	28.5648	439.177
No.4	31127	31247.7	31187.3	479498		No.4	1048.46	951.318	999.89	15373.1		No.4	345.148	286.886	316.017	4858.69		No.4	49.866		49.866	766.678		No.4	2.32906	1.71261	2.02084	31.0699		No.4	0.272561	0.188126	0.230343	3.54147		No.4	1.15586		1.15586	17.7711
No.5	17.1017	23.2292	20.1655	310.039		No.5						No.5	10.7023	10.9588	10.8306	166.517		No.5	1.78008	2.30648	2.04328	31.4149		No.5						No.5						No.5	0.498246		0.498246	7.66042
No.6	37609.6	40614.3	39111.9	601337		No.6	132.118	147.825	139.972	2152.03		No.6	732.684	746.215	739.449	11368.9		No.6	196.369	194.839	195.604	3007.37		No.6	10.6469	10.4404	10.5437	162.106		No.6						No.6	0.522406	0.531027	0.526716	8.09814
No.7	1159.3	1218.7	1189	18280.6		No.7	27.8869	30.6394	29.2632	449.914		No.7	43.642	50.7785	47.2102	725.846		No.7	19.2423	24.3587	21.8005	335.177		No.7	1.1448	1.18375	1.16427	17.9004		No.7						No.7
No.8	9.60558	9.0836	9.34459	143.671		No.8	12.6459	9.38156	11.0137	169.333		No.8	25.6095	30.3069	27.9582	429.852		No.8	16.0332	14.7595	15.3964	236.716		No.8	1.25833	1.73052	1.49442	22.9764		No.8						No.8
No.9	14191.8	14250.3	14221	218645		No.9	358.423	349.659	354.041	5443.3		No.9	474.133	499.017	486.575	7480.98		No.9	0.964857	1.20821	1.08654	16.7052		No.9	12.0098	11.3277	11.6688	179.405		No.9						No.9	121.157	110.307	115.732	1779.35
No.10	26.5024	29.6268	28.0646	431.487	SE	No.10	4.00773	3.15106	3.57939	55.0324	SE	No.10	3.31589	6.25927	4.78758	73.608	SE	No.10					SE	No.10					SE	No.10	0.363995	0.484362	0.424178	6.52165	SE	No.10	6.86163	6.1806	6.52112	100.261	SE
AV				135428	71292.2	AV				2655.27	1697.22	AV				2553.35	1266.86	AV				532.244	318.653	AV				611.629	542.5	AV				5.31663	0.906303	AV				337.692	247.432
				Pre	1h	2h	3h	6h	12h	24h	48h		SE	1h	2h	3h	6h	12h	24h	48h	pre
			IV	0	739965	27929.9	53345	9274.28	7948.01	26.4595	41.3593		IV	423342	6674.88	23608.6	2449.87	7408.69	8.37189	12.7849
			IM	0	84334	21906.5	58617.3	14651.9	209.846	5.49901	48.7276		IM	12302.6	7682.78	15427.5	4555.47	48.0626	1.48831	18.3872
			IP	0	135428	2655.27	2553.35	532.244	611.629	5.31663	337.692		IP	71292.2	1697.22	1266.86	318.653	542.5	0.906303	247.432
		0.774898						0.774898						0.774898
		0.774898						0.774898
		0.774898						0.774898
		0.774898						0.774898
		0.774898						0.774898
		0.774898						0.774898
		0.774898						0.774898
		0.774898						0.774898
		0.774898						0.774898
		0.774898						0.774898
		0.774898						0.774898
		0.774898						0.774898
		0.774898						0.774898
		0.774898						0.774898
		0.774898						0.774898
		0.774898						0.774898
		0.774898						0.774898
		0.774898						0.774898
		0.774898						0.774898
		0.774898						0.774898
		0.774898						0.774898
		0.774898						0.774898
		0.774898						0.774898
		0.774898						0.774898
		0.774898						0.774898
		0.774898						0.774898
		0.774898						0.774898
		0.774898						0.774898
		0.774898						0.774898
		0.774898						0.774898
		0.774898						0.774898
		0.774898						0.774898
		0.774898						0.774898
		0.774898						0.774898
		0.774898						0.774898
		0.774898						0.774898
		0.774898						0.774898
		0.774898						0.774898
		0.774898						0.774898
		0.774898						0.774898
		0.774898						0.774898
		0.774898						0.774898
		0.774898						0.774898
		0.774898						0.774898
		0.774898						0.774898
		0.774898						0.774898
		0.774898						0.774898
		0.774898						0.774898
		0.774898						0.774898
		0.774898						0.774898
		0.774898						0.774898
		0.774898						0.774898
		0.774898						0.774898
		0.774898						0.774898
		0.774898						0.774898
		0.774898						0.774898
		0.774898						0.774898
		0.774898						0.774898
		0.774898						0.774898
		0.774898						0.774898

## Sheet: SYBR Blood
1h						2h						3h						6h						12h						24h						48h						pre
	IV		Ave	Number of Copy			IV		Ave	Number of Copy			IV		Ave	Number of Copy			IV		Ave	Number of Copy			IV		Ave	Number of Copy			IV		Ave	Number of Copy			IV		Ave	Number of Copy			IV		Ave	Number of Copy
No.1	209.67	213.063	211.366	3249.71		No.1	15.2975	16.1943	15.7459	242.089		No.1	28.7947	21.7721	25.2834	388.726		No.1	114.366	108.964	111.665	1716.83		No.1	8.14194	7.88678	8.01436	123.219		No.1	1.92821	1.78064	1.85443	28.5114		No.1	1.48473	1.39826	1.44149	22.1626		No.1	2.28738	2.17727	2.23232	34.3215
No.2	88.1481	89.1481	88.6481	1362.94		No.2	5.48742	6.67975	6.08358	93.5337		No.2	91.9321	71.7827	81.8574	1258.54		No.2	28.4243	31.8353	30.1298	463.239		No.2	6.04365	5.99533	6.01949	92.5484		No.2	2.5342	2.34405	2.43912	37.501		No.2	1.43795	1.17623	1.30709	20.0962		No.2	2.25632	2.01892	2.13762	32.8654
No.3	4843.73	4933.9	4888.81	75164.4		No.3	429.09	353.568	391.329	6016.6		No.3	296.683	218	257.341	3956.57		No.3	93.2217	88.3078	90.7647	1395.49		No.3	3.84876	4.19088	4.01982	61.8038		No.3	2.56459	2.8738	2.71919	41.807		No.3	1.86783	1.7717	1.81977	27.9785		No.3	1.49367	1.605	1.54933	23.8207
No.4	1948.21	2029.05	1988.63	30574.8		No.4	305.8	273.31	289.555	4451.84		No.4						No.4						No.4						No.4						No.4						No.4	1.88331	1.03419	1.45875	22.4279
No.5	124.158	125.538	124.848	1919.51		No.5	2.65967	2.51959	2.58963	39.815		No.5	22.1955	19.3387	20.7671	319.289		No.5	3.53971	3.68746	3.61358	55.558		No.5	1.01428	1.14066	1.07747	16.5658		No.5	1.62652	1.17775	1.40213	21.5575		No.5	0.940298	0.895578	0.917938	14.1131		No.5	1.67383	1.58309	1.62846	25.0372
No.6	13148.2	13859.6	13503.9	207620		No.6	206.928	245.999	226.464	3481.83		No.6	890.833	728.576	809.705	12449		No.6	338.517	365.54	352.029	5412.36		No.6	1159.4	455.662	807.531	12415.6		No.6	3.77843	3.18534	3.48188	53.5332		No.6	1.40355	1.51841	1.46098	22.4623		No.6	2.16699	2.16772	2.16735	33.3226
No.7	140668	161824	151246	2.32538e+06		No.7	204.574	226.566	215.57	3314.34		No.7	577.079	468.587	522.833	8038.44		No.7	210.564	206.422	208.493	3205.53		No.7	7.89269	8.05497	7.97383	122.596		No.7	3.00849	2.86583	2.93716	45.1581		No.7	1.88635	2.16755	2.02695	31.1639		No.7	1.28375	2.75521	2.01948	31.049
No.8	733.676	679.75	706.713	10865.5		No.8	224.222	361.593	292.907	4503.38		No.8	437.479	348.692	393.086	6043.6		No.8	17.9105	19.3352	18.6229	286.322		No.8	0.941402	1.08395	1.01267	15.5696		No.8	1.53615	1.83311	1.68463	25.9008		No.8	1.44013	1.36431	1.40222	21.5589		No.8	3.43849	3.14688	3.29268	50.6242
No.9	13235.6	13071	13153.3	202229		No.9	130.709	341.66	236.185	3631.29		No.9	1858.63	1466.16	1662.39	25558.9		No.9	263.501	239.823	251.662	3869.24		No.9	8.03196	8.50714	8.26955	127.143		No.9	5.32032	4.82737	5.07384	78.0092		No.9	2.29238	2.2849	2.28864	35.1873		No.9	1.47181	1.9423	1.70706	26.2456
No.10	86173.3	92920.2	89546.8	1.37676e+06	SE	No.10	573.482	528.814	551.148	8473.78	SE	No.10	5283.53		5283.53	81233.1	SE	No.10	259.444	240.522	249.983	3843.43	SE	No.10	7.77552	8.17581	7.97567	122.624	SE	No.10	4.97983	4.96846	4.97415	76.4764	SE	No.10	1.31234	1.23068	1.27151	19.5491	SE	No.10	4.4503	4.54591	4.4981	69.1573	SE
AV				423512	249442					3424.85	863.912					15471.8	8637.21					2249.78	634.135					1455.3	1370.12					45.3838	6.87641					23.808	2.16177					34.8871	4.58631
	IM						IM						IM						IM						IM						IM						IM						IM
No.1	1929.2	1758.38	1843.79	28347.9		No.1	184.802	182.285	183.543	2821.94		No.1	393.319	360.156	376.738	5792.26		No.1						No.1						No.1						No.1						No.1	2.40497	1.39917	1.90207	29.2439
No.2	205.789	204.62	205.205	3154.98		No.2	12.8424	13.5352	13.1888	202.775		No.2	202.552	200.52	201.536	3098.57		No.2	13.9337	14.1406	14.0372	215.818		No.2	1.25317	1.20844	1.23081	18.9234		No.2	1.42476	1.64767	1.53622	23.619		No.2	1.10404	1.1182	1.11112	17.0833		No.2	2.77045	3.07416	2.92231	44.9298
No.3	2982.04	2979.98	2981.01	45832.4		No.3	106.571	98.3201	102.446	1575.08		No.3	243.303	226.018	234.661	3607.85		No.3	395.051	397.75	396.401	6094.57		No.3	4.42005	3.86958	4.14481	63.7256		No.3	0.691438	1.86572	1.27858	19.6579		No.3	1.60565	1.56124	1.58344	24.3451		No.3	2.42712	2.31995	2.37353	36.4926
No.4	3060.51	2987.41	3023.96	46492.7		No.4	203.437	182.478	192.957	2966.67		No.4	1363.37	1366.73	1365.05	20987.3		No.4	92.2564	85.4283	88.8423	1365.93		No.4	3.60773	3.21836	3.41304	52.4748		No.4	1.80931	1.99184	1.90057	29.2209		No.4	3.24038	2.95408	3.09723	47.6192		No.4	1.6242	4.41044	3.01732	46.3906
No.5	1047.62	1151.53	1099.57	16905.7		No.5						No.5						No.5						No.5						No.5						No.5						No.5	2.1949	1.77605	1.98547	30.5262
No.6	831.116	890.586	860.851	13235.4		No.6	288.301	213.282	250.792	3855.86		No.6	1751.99	2116.67	1934.33	29739.8		No.6	225.546	229.075	227.311	3494.85		No.6	1.49673	1.64435	1.57054	24.1467		No.6	1.61874	1.63271	1.62573	24.9952		No.6	1.72832	1.9119	1.82011	27.9837		No.6	1.22157	2.29551	1.75854	27.0372
No.7	2716.24	1976.1	2346.17	36071.9		No.7	34.0973	34.3439	34.2206	526.134		No.7	2045.02	2064.64	2054.83	31592.6		No.7	95.5345	95.8459	95.6902	1471.21		No.7	5.56673	6.31268	5.93971	91.3216		No.7	1.89339	1.75279	1.82309	28.0296		No.7	1.7728	1.98595	1.87938	28.895		No.7	2.9495	2.81878	2.88414	44.343
No.8	3769.5	2961.81	3365.66	51746.2		No.8	805.609	932.369	868.989	13360.5		No.8	426.144	392.298	409.221	6291.68		No.8	58.9546	59.3857	59.1702	909.728		No.8	2.23084	2.23836	2.2346	34.3565		No.8	2.03566	1.78164	1.90865	29.345		No.8	1.72636	1.52415	1.62526	24.988		No.8	2.62059	2.60986	2.61523	40.2085
No.9	2197.57	1927	2062.29	31707.2		No.9	96.8002	83.5142	90.1572	1386.15		No.9	2977.87	2533.2	2755.53	42365.7		No.9	708.39	633.257	670.823	10313.8		No.9	2.65392	2.75184	2.70288	41.5562		No.9	1.49643	1.66973	1.58308	24.3395		No.9	1.85523	1.98288	1.91905	29.505		No.9	2.24943	1.63178	1.9406	29.8363
No.10	2823.31	2749.16	2786.24	42837.8	SE	No.10	95.3199	77.8188	86.5693	1330.98	SE	No.10	543.448	482.463	512.956	7886.58	SE	No.10	752.323	719.831	736.077	11317	SE	No.10	2.22013	2.03427	2.1272	32.7052	SE	No.10	1.64995	1.76042	1.70519	26.2168	SE	No.10	1.75643	2.03202	1.89422	29.1232	SE	No.10	2.02911	1.80427	1.91669	29.4687	SE
AV				31633.2	5109.23					3114.01	1340.36					16818	4902.1					4397.86	1546.78					44.9012	8.39142					25.678	1.15387					28.6928	3.06771					35.8477	2.38426
	IP						IP						IP						IP						IP						IP						IP						IP
No.1	12.3037	12.1607	12.2322	188.067		No.1	0.96614	0.874717	0.920429	14.1514		No.1	1.28768	1.29432	1.291	19.8488		No.1	2.86017	2.82789	2.84403	43.7263		No.1	0.913184	0.917387	0.915286	14.0723		No.1	1.15175	1.14596	1.14886	17.6634		No.1	1.45231	1.17467	1.31349	20.1947		No.1	1.92594	5.38459	3.65526	56.1988
No.2	3.79643	3.93316	3.8648	59.4204		No.2	0.992803	0.739176	0.865989	13.3144		No.2	1.42467	1.23837	1.33152	20.4718		No.2	2.18203	2.00608	2.09405	32.1956		No.2	0.957925	1.11394	1.03593	15.9272		No.2	1.60336	1.64576	1.62456	24.9772		No.2	1.38679	1.04766	1.21723	18.7146		No.2	2.5957	3.52284	3.05927	47.0356
No.3	574.854	569.359	572.107	8796.01		No.3	0.883756	0.902602	0.893179	13.7324		No.3	3.29267	2.86081	3.07674	47.3042		No.3	1.9614	2.33806	2.14973	33.0516		No.3	31.1326	40.8449	35.9888	553.319		No.3	1.71629	1.32897	1.52263	23.4101		No.3	5.87703	5.33894	5.60799	86.2215		No.3	1.92699	5.2488	3.5879	55.1631
No.4	12933.7	10290	11611.8	178529		No.4	101.995	99.0551	100.525	1545.55		No.4	55.4166	50.3888	52.9027	813.367		No.4	9.90552	8.93452	9.42002	144.831		No.4	1.22082	1.14813	1.18447	18.211		No.4	2.03189	1.71332	1.8726	28.7908		No.4	1.20982	1.2262	1.21801	18.7266		No.4	1.62288	6.0754	3.84914	59.1796
No.5	5.66323	4.65999	5.16161	79.3586		No.5	0.964054	1.4243	1.19418	18.3602		No.5	2.21222	1.97089	2.09155	32.1572		No.5	1.8298	2.14051	1.98515	30.5213		No.5	0.7549	1.18267	0.968783	14.8948		No.5	1.52992	1.62261	1.57626	24.2347		No.5	1.42193	1.40873	1.41533	21.7604		No.5	1.72355	4.78491	3.25423	50.0331
No.6	21849.8	34765.3	28307.6	435223		No.6	9.0034	15.0381	12.0208	184.817		No.6	124.828	125.028	124.928	1920.73		No.6	39.3548	41.16	40.2574	618.948		No.6	2.43975	2.15346	2.29661	35.3098		No.6	2.18355	1.77309	1.97832	30.4162		No.6	1.85658	1.81283	1.8347	28.2082		No.6	2.44703	4.79683	3.62193	55.6864
No.7	199.759	260.012	229.886	3534.44		No.7	3.69251	3.48195	3.58723	55.1529		No.7	7.1335	7.20097	7.16723	110.195		No.7	3.95803	4.07884	4.01843	61.7825		No.7	1.25506	1.58838	1.42172	21.8586		No.7	2.29495	2.28233	2.28864	35.1874		No.7	1.51977	1.21245	1.36611	21.0036		No.7	2.28215	5.54446	3.9133	60.1661
No.8	2.44216	2.22062	2.33139	35.8445		No.8	2.18582	2.85902	2.52242	38.7817		No.8	4.70075	3.97741	4.33908	66.7123		No.8	4.63267	3.83552	4.2341	65.0983		No.8	1.25602	1.19157	1.22379	18.8156		No.8	2.2939	1.91998	2.10694	32.3937		No.8	1.35842	1.18632	1.27237	19.5624		No.8	3.5204	6.39482	4.95761	76.2221
No.9	6735.13	5269.15	6002.14	92281.6		No.9	32.7714	26.2414	29.5064	453.655		No.9	93.5487	83.4142	88.4814	1360.38		No.9	1.58878	1.39496	1.49187	22.9372		No.9	2.7931	2.37363	2.58337	39.7187		No.9	1.67951	1.78591	1.73271	26.6401		No.9	19.2899	16.9485	18.1192	278.578		No.9	1.94832	4.20705	3.07768	47.3186
No.10	5.92847	4.76346	5.34596	82.193	SE	No.10	1.01666	0.956309	0.986485	15.167	SE	No.10		1.61613	1.61613	24.8476	SE	No.10	1.62202	1.73866	1.68034	25.8348	SE	No.10	0.981066	0.847783	0.914425	14.0591	SE	No.10	2.09746	2.13844	2.11795	32.563	SE	No.10	1.94166	1.71088	1.82627	28.0785	SE	No.10	1.75508	1.77819	1.76664	27.1616	SE
AV				71880.8	44500.8					235.268	152.055					441.602	217.884					107.893	57.9162					74.6186	53.2647					27.6277	1.66646					54.1048	25.7675					53.4165	3.93486
		コピー数	1h	2h	3h	6h	12h	24h	48h	pre		SE	1h	2h	3h	6h	12h	24h	48h	pre
		IV	423512	3424.85	15471.8	2249.78	1455.3	45.3838	23.808	23.808		IV	249442	863.912	8637.21	634.135	1370.12	6.87641	2.16177	4.58631
		IM	31633.2	3114.01	16818	4397.86	44.9012	25.678	28.6928	28.6928		IM	5109.23	1340.36	4902.1	1546.78	8.39142	1.15387	3.06771	2.38426
		IP	71880.8	235.268	441.602	107.893	74.6186	27.6277	54.1048	54.1048		IP	44500.8	152.055	217.884	57.9162	53.2647	1.66646	25.7675	3.93486

## Sheet: Taqman Stool
Pre						6h						12h						24h						48h
	IV		Ave	Number of Copy			IV		Ave	Number of Copy			IV		Ave	Number of Copy			IV		Ave	Number of Copy			IV		Ave	Number of Copy
No.1			#DIV/0!	#DIV/0!		No.1	1.53805	1.55901	1.54853	23.8083		No.1	8.51792		8.51792	130.961		No.1	15.5447	14.6964	15.1205	232.475		No.1	0.66067	0.66933	0.665	10.2242
No.2						No.2	2.28485	2.57341	2.42913	37.3473		No.2	11.9106	11.0886	11.4996	176.804		No.2	33.1382	32.0185	32.5784	500.885		No.2
No.3						No.3	2.13004	1.66083	1.89544	29.1419		No.3	10.6569	10.0413	10.3491	159.115		No.3	76.5769	87.5861	82.0815	1261.98		No.3	0.382899		0.382899	5.88698
No.4						No.4						No.4						No.4						No.4
No.5			#DIV/0!	#DIV/0!		No.5	1.24058	1.22243	1.23151	18.9342		No.5	5.61269	4.84328	5.22798	80.3791		No.5	11.6521	9.13275	10.3924	159.781		No.5
No.6						No.6	0.629983	0.606045	0.618014	9.50183		No.6	25.2442	25.1797	25.212	387.628		No.6	23.3151	32.0163	27.6657	425.355		No.6
No.7						No.7	7.67921	7.50421	7.59171	116.721		No.7		1.69232	1.69232	26.0191		No.7						No.7	0.624783	0.505571	0.565177	8.68946
No.8						No.8	1.14642	1.55974	1.35308	20.8033		No.8	1.65846	1.73577	1.69711	26.0927		No.8	71.0287	71.6531	71.3409	1096.85		No.8	0.872417	1.04649	0.959454	14.7514
No.9						No.9		0.154051	0.154051	2.3685		No.9	1.28479	1.55088	1.41784	21.7989		No.9						No.9
No.10						No.10	0.809171	0.639047	0.724109	11.133	SE	No.10	3.71548	3.72689	3.72118	57.2123	SE	No.10	201.587	201.006	201.297	3094.89	SE	No.10	0.446216	0.918696	0.682456	10.4926	SE
AV				#DIV/0!		AV				29.9732	11.4019	AV				118.446	38.9598	AV				967.46	388.329	AV				10.0089	1.44053
	IM						IM						IM						IM						IM
No.1			#DIV/0!	#DIV/0!		No.1						No.1						No.1						No.1
No.2			#DIV/0!	#DIV/0!		No.2	0.166923	0.150285	0.158604	2.4385		No.2	12.3769	12.1555	12.2662	188.59		No.2	8.23618	6.66348	7.44983	114.539		No.2	2.39802	1.63505	2.01654	31.0038
No.3			#DIV/0!	#DIV/0!		No.3	1.09084	1.28569	1.18827	18.2694		No.3	11.6837	11.92	11.8018	181.45		No.3	156.608	156.609	156.608	2407.82		No.3	3.08007	4.11445	3.59726	55.3071
No.4			#DIV/0!	#DIV/0!		No.4	2.40621	2.77063	2.58842	39.7964		No.4	9.05472	9.4911	9.27291	142.569		No.4	96.3712	97.491	96.9311	1490.29		No.4			#DIV/0!
No.5			#DIV/0!	#DIV/0!		No.5						No.5						No.5						No.5
No.6	7.07059		7.07059	108.709		No.6	0.41306	0.63795	0.525505	8.07952		No.6	2.30888	2.33576	2.32232	35.7051		No.6	24.4865	18.8378	21.6621	333.051		No.6			#DIV/0!
No.7			#DIV/0!	#DIV/0!		No.7	0.763955	0.782029	0.772992	11.8846		No.7						No.7	41.6852	48.3011	44.9932	691.76		No.7			#DIV/0!
No.8			#DIV/0!	#DIV/0!		No.8		0.18336	0.18336	2.81912		No.8		0.235764	0.235764	3.62482		No.8	28.5248	22.8572	25.691	394.993		No.8			#DIV/0!
No.9			#DIV/0!	#DIV/0!		No.9	0.526572	0.261863	0.394217	6.061		No.9	1.90698	1.30447	1.60572	24.6876		No.9	56.607	54.6847	55.6458	855.542		No.9			#DIV/0!
No.10			#DIV/0!	#DIV/0!		No.10	2.18328	1.8835	2.03339	31.2629	SE	No.10	1.56609	1.58839	1.57724	24.2497	SE	No.10	68.5671	64.5453	66.5562	1023.29		No.10			#DIV/0!		SE
AV				#DIV/0!		AV				15.0764	4.88009	AV				85.8395	30.7536	AV				913.911	263.031	AV				43.1554	12.1516
	IP						IP						IP						IP						IP
No.1			#DIV/0!	#DIV/0!		No.1	90.3001	77.2213	83.7607	1287.8		No.1	3.05456	3.35298	3.20377	49.2573		No.1				0		No.1			#DIV/0!	#DIV/0!
No.2			#DIV/0!	#DIV/0!		No.2	2.85344	2.92089	2.88717	44.3896		No.2						No.2				0		No.2			#DIV/0!	#DIV/0!
No.3			#DIV/0!	#DIV/0!		No.3						No.3						No.3				0		No.3			#DIV/0!	#DIV/0!
No.4			#DIV/0!	#DIV/0!		No.4		0.132166	0.132166	2.03202		No.4						No.4				0		No.4			#DIV/0!	#DIV/0!
No.5			#DIV/0!	#DIV/0!		No.5	0.814982	0.935027				No.5						No.5				0		No.5			#DIV/0!	#DIV/0!
No.6			#DIV/0!	#DIV/0!		No.6	2.95787	2.97325	2.96556	45.5949		No.6	2.00997	2.17051	2.09024	32.137		No.6				0		No.6			#DIV/0!	#DIV/0!
No.7			#DIV/0!	#DIV/0!		No.7	0.269055		0.269055	4.13667		No.7						No.7				0		No.7			#DIV/0!	#DIV/0!
No.8			#DIV/0!	#DIV/0!		No.8	0.418011	0.494504	0.456257	7.01486		No.8	1.08976	1.15837	1.12407	17.2823		No.8				0		No.8			#DIV/0!	#DIV/0!
No.9			#DIV/0!	#DIV/0!		No.9						No.9						No.9				0		No.9			#DIV/0!	#DIV/0!
No.10			#DIV/0!	#DIV/0!		No.10	714.286	752.572	733.429	11276.3	SE	No.10	38.6308	42.6102	40.6205	624.531	SE	No.10						No.10					SE
AV				#DIV/0!		AV				1809.61	1587.86	AV				180.802	148.054	AV				0	0	AV				#DIV/0!	#DIV/0!
									pre	6h	12h	24h	48h		SE	pre	6h	12h	24h	48h
								IV	0	29.9732	85.4291	967.46	10.0089		IV		11.4019	38.9598	388.329	1.44053
								IM	0	15.0764	85.8395	913.911	43.1554		IM		4.88009	30.7536	263.031	12.1516
								IP	0	1809.61	180.802	0	0		IP		1587.86	148.054	0	#DIV/0!

## Sheet: SYBR Stool
Pre						6h						12h						24h						48h
	IV		Ave	Number of Copy			IV		Ave	Number of Copy			IV		Ave	Number of Copy			IV		Ave	Number of Copy			IV		Ave	Number of Copy
No.1	24.4101	24.3106	24.3604	374.535		No.1	1.82177	2.22003	2.0209	31.0709		No.1	6.21995	6.56322	6.39159	98.2692		No.1	5.09594		5.09594	78.349		No.1	1.27077	1.44561	1.35819	20.8819
No.2	10.2282	12.9758	11.602	178.378		No.2	2.60136	2.55369	2.57753	39.6289		No.2	4.96962	5.06417	5.0169	77.1337		No.2	8.14146	9.40386	8.77266	134.878		No.2	1.23841	1.4627	1.35056	20.7645
No.3	7.21667	10.5305	8.87358	136.429		No.3	2.48566	2.21095	2.3483	36.1046		No.3	5.32278	6.51384	5.91831	90.9927		No.3	20.4568	20.4146	20.4357	314.194		No.3	1.11487	1.25278	1.18383	18.2011
No.4	21.7077	23.3281	22.5179	346.208		No.4						No.4						No.4						No.4
No.5	28.2146	23.0044	25.6095	393.74		No.5	3.40365	3.24831	3.32598	51.1362		No.5	4.43438	5.18233	4.80836	73.9274		No.5	6.57421	5.06588	5.82004	89.4818		No.5	1.12992	1.23061	1.18026	18.1463
No.6	15.5015	14.3707	14.9361	229.639		No.6	5.30971	5.54497	5.42734	83.4441		No.6	14.2042	17.1009	15.6525	240.654		No.6	14.0484	15.7783	14.9133	229.289		No.6	3.52551	4.0355	3.78051	58.1245
No.7	21.9395	21.3856	21.6625	333.057		No.7	12.7751	12.1906	12.4828	191.921		No.7	6.22358	5.53534	5.87946	90.3953		No.7	9.40868	9.54028	9.47448	145.668		No.7	3.5521	3.72385	3.63798	55.9331
No.8	11.4316	7.30674	9.36918	144.049		No.8	3.19703	3.87092	3.53397	54.3341		No.8	4.97042	6.89818	5.9343	91.2385		No.8	23.3809	25.3831	24.382	374.868		No.8	2.9028	3.1699	3.03635	46.6831
No.9	18.1913	19.9281	19.0597	293.039		No.9	3.20233	4.34937	3.77585	58.0529		No.9	10.6069	10.1445	10.3757	159.524		No.9	7.03978	10.0949	8.56735	131.721		No.9	1.73596	2.06848	1.90222	29.2462
No.10	126.034	113.276	119.655	1839.66	SE	No.10	2.68572	2.88431	2.78502	42.819	SE	No.10	5.11796	5.14867	5.13332	78.9236	SE	No.10	41.6605	44.3213	42.9909	660.975	SE	No.10	2.42391	2.4832	2.45356	37.7229	SE
AV				426.874	159.793	AV				65.3902	16.6349	AV				111.229	18.2924	AV				239.936	62.5265	AV				33.9671	5.41162
	IM						IM						IM						IM						IM
No.1	24.0627	22.6554	23.359	359.14		No.1						No.1						No.1						No.1
No.2	11.296	10.5765	10.9363	168.143		No.2	1.50131	1.71739	1.60935	24.7434		No.2	10.4479	9.47071	9.95932	153.122		No.2	6.08951	6.82728	6.4584	99.2964		No.2	1.88633	1.99583	1.94108	29.8437
No.3	136.538	174.351	155.445	2389.93		No.3	2.39175	2.46631	2.42903	37.3458		No.3	15.6643	15.6087	15.6365	240.407		No.3	38.9382	38.867	38.9026	598.119		No.3	3.85171	3.91139	3.88155	59.6779
No.4	11.3899	11.9139	11.6519	179.146		No.4	3.63717	4.01658	3.82688	58.8374		No.4	7.63374	7.25645	7.4451	114.467		No.4	20.3158	21.1849	20.7503	319.032		No.4	1.53291	1.71988	1.62639	25.0054
No.5	19.8683	21.2533	20.5608	316.118		No.5						No.5						No.5						No.5
No.6	13.4058	15.2764	14.3411	220.491		No.6	4.54534	4.16534	4.35534	66.9624		No.6	5.66698	5.75152	5.70925	87.7784		No.6	9.33117	10.5197	9.92546	152.602		No.6	3.79132	3.86392	3.82762	58.8488
No.7	100.994	107.542	104.268	1603.1		No.7	1.99355	1.99024	1.9919	30.625		No.7	3.27054	3.20836				No.7	11.7911	12.8485	12.3198	189.414		No.7	2.10588	2.371	2.23844	34.4156
No.8	36.7223	43.9485	40.3354	620.148		No.8	1.77806	2.06095	1.91951	29.512		No.8	3.90925	3.5552	3.73223	57.3821		No.8	10.884	10.3237	10.6038	163.032		No.8	5.32641	5.14267	5.23454	80.4799
No.9	29.0011	27.7936	28.3973	436.603		No.9	2.6217	3.0819	2.8518	43.8457		No.9	6.99614	5.9614	6.47877	99.6097		No.9	23.0481	21.4774	22.2628	342.285		No.9	3.46901	3.62236	3.54568	54.5141
No.10	102.746	70.4071	86.5766	1331.1	SE	No.10	3.7972	3.97809	3.88765	59.7717	SE	No.10	4.81948	4.41641	4.61795	70.9999	SE	No.10	17.5101	14.5602	16.0351	246.537	SE	No.10	1.02315	2.39833	1.71074	26.3023	SE
AV				762.391	239.309	AV				43.9554	5.66956	AV				117.681	23.5857	AV				263.79	56.1236	AV				46.136	7.1181
	IP						IP						IP						IP						IP
No.1	15.0466	16.7607	15.9037	244.515		No.1	67.1506	2.96166	35.0561	538.98		No.1	6.2182	6.23176	6.22498	95.7076		No.1	7.8478	7.60276	7.72528	118.774		No.1	3.7174	4.06872	3.89306	59.8549
No.2	22.6092	24.3504	23.4798	360.996		No.2	2.48977	2.87504	2.6824	41.2414		No.2	8.70094	7.61846	8.1597	125.453		No.2	6.04469	6.42751	6.2361	95.8786		No.2	2.12869	1.57417	1.85143	28.4653
No.3	22.2228	23.7466	22.9847	353.384		No.3	2.60939	2.65141				No.3	2.6016	2.82802	2.71481	41.7395		No.3	0.365361	7.03081	3.69809	56.8572		No.3	1.84026	1.53728	1.68877	25.9645
No.4	95.3775	96.9364	96.157	1478.39		No.4	7.29231	6.9822	7.13726	109.734		No.4	3.26407	3.36558	3.31483	50.9647		No.4	6.89561	6.59708	6.74634	103.724		No.4	3.09372	2.89446	2.99409	46.0335
No.5	16.1736	15.8348	16.0042	246.061		No.5	3.46582	3.27701				No.5	6.30298	5.87215	6.08757	93.595		No.5	5.5076	5.54106	5.52433	84.9353		No.5	7.50007	7.06191	7.28099	111.944
No.6	75.1919	74.3745	74.7832	1149.77		No.6	10.7938	2.56641	6.6801	102.705		No.6	5.64023	5.38859	5.51441	84.7828		No.6	8.61549	8.02564	8.32057	127.927		No.6	5.73615	4.83265	5.2844	81.2464
No.7	252.857	305.674	279.266	4293.65		No.7	3.0555	2.82138	2.93844	45.1779		No.7	2.66819	2.67196	2.67007	41.0518		No.7	8.64672	8.53627	8.59149	132.092		No.7	3.08163	2.76953	2.92558	44.9801
No.8	17.6561	17.8198	17.738	272.717		No.8	3.962	3.14847	3.55524	54.661		No.8	2.91506	2.19012	2.55259	39.2454		No.8	4.87841	5.15776	5.01808	77.1519		No.8	2.43124	2.67338	2.55231	39.2411
No.9	19.0245	15.8063	17.4154	267.758		No.9	6.18231	5.88138				No.9	3.94526	3.64557	3.79541	58.3536		No.9	11.3326	9.88048	10.6065	163.073		No.9	2.83091	2.81542	2.82316	43.4055
No.10	11.809	12.1488	11.9789	184.173	SE	No.10	443.475	452.626	448.051	6888.68	SE	No.10	27.0509	25.9655	26.5082	407.557	SE	No.10	9.53327	8.75831	9.14579	140.614	SE	No.10	2.60899	1.98013	2.29456	35.2784	SE
AV				885.142	403.647	AV				1111.6	965.157	AV				103.845	34.9733	AV				110.103	10.2255	AV				51.6413	8.39436
						pre	6h	12h	24h	48h		SE	pre	6h	12h	24h	48h
					IV	426.874	65.3902	111.229	239.936	33.9671		IV	159.793	16.6349	18.2924	62.5265	5.41162
					IM	762.391	43.9554	117.681	263.79	46.136		IM	239.309	5.66956	23.5857	56.1236	7.1181
					IP	885.142	1111.6	103.845	110.103	51.6413		IP	403.647	965.157	34.9733	10.2255	8.39436

## Sheet: Table
	Method	Group	Copy/μL of Transgene
			Pre	1h	2h	3h	6h	12h	24h	48h
	Taqman qPCR	IV	0	739965	27929.9	53345	9274.3	7948	26.5±8.4	41.4±12.8
				±423342.3	±6674.9	±23608.6	±2449.9	±7408.7
		IM	0	84334	21906.5	58617.3	14651.9	209.8	5.5±1.5	48.7±18.4
				±12302.6	±7682.8	±15427.5	±4555.5	±48.1
		IP	0	135428	2655.3	2553.3	532.2	611.6	5.3±0.9	337.7
				±71292.2	±1697.2	±1266.9	±318.7	±542.5		±247.4
	SYBR qPCR	IV	34.9±4.6	423512	3424.8	15471.8	2249.8	1455.3	45.4±6.9	23.8±2.2
				±249442.4	±963.9	±8637.2	±634.1	±1370.1
		IM	35.8±2.4	31633.2	3114	16818	4397.9	44.9±8.4	25.7±1.2	28.7±3.1
				±5109.2	±1340.4	±4902.1	±1546.8
		IP	53.4±3.9	71880.8	235.3	441.6	107.9	74.6±53.3	27.6±1.7	54.1±25.8
				±44500.8	±152.1	±217.9	±57.9
	Method	Group	Copy/μL of Transgene
			pre	6h	12h	48h
	Taqman qPCR	IV	0	30.0±11.4	85.4±39	10.0±1.4
		IM	0	15.1±4.9	85.8±30.8	43.2±12.2
		IP	0	1809.6±1587.9	180.8±148.1	Undetermined
	SYBR qPCR	IV	426.9±159.8	65.4±16.6	111.2±18.3	34±5.4
		IM	762.4±239.3	44±5.7	117.7±23.6	46.1±7.1
		IP	885.1±403.6	1111.6±965.2	103.8±35	51.6±8.4
